# Supplementary material for: Environmental Modulation of Mini-Clonal Gardens for Cutting Production and Propagation of Hard- and Easy-to-Root Eucalyptus spp
Source: MDPI journal article supplement (doi:10.3390/plants11233281), 2022-11-29
Supplement: s1 [file s1]

## Article

# Environmental Modulation of Mini-Clonal Gardens for Cutting Production and Propagation of Hard- and Easy-to-Root *Eucalyptus* spp.

Johnatan Vilasboa <sup>1,2,†</sup>, Cibele T. Da Costa <sup>1,3,†</sup> and Arthur G. Fett-Neto <sup>1,2,3,\*</sup>

<sup>1</sup> Plant Physiology Laboratory, Federal University of Rio Grande do Sul, Porto Alegre, RS 91501-970, Brazil; johnatan.vilasboa@gmail.com (J.V.); cibeletesser@gmail.com (C.T.D.C.)

<sup>2</sup> Center for Biotechnology, Federal University of Rio Grande do Sul, Porto Alegre, RS 91501-970, Brazil

<sup>3</sup> Department of Botany, Federal University of Rio Grande do Sul, Porto Alegre, RS 91501-970, Brazil

\* Correspondence: fett.neto@ufrgs.br

† These authors contributed equally to this work.

**Citation:** Vilasboa, J.; Da Costa, C.T.; Fett-Neto, A.G. Environmental Modulation of Mini-Clonal Gardens for Cutting Production and Propagation of Hard- and Easy-to-Root *Eucalyptus* spp. *Plants* **2022**, *11*, 3281. <https://doi.org/10.3390/plants11233281>

Academic Editor: Uwe Druege

Received: José Manuel Pérez Pérez

Accepted: 18 October 2022

Published: 29 November 2022

**Publisher's Note:** MDPI stays neutral with regard to jurisdictional claims in published maps and institutional affiliations.

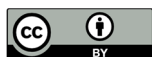

**Copyright:** © 2022 by the authors. Licensee MDPI, Basel, Switzerland. This article is an open access article distributed under the terms and conditions of the Creative Commons Attribution (CC BY) license (<https://creativecommons.org/licenses/by/4.0/>).

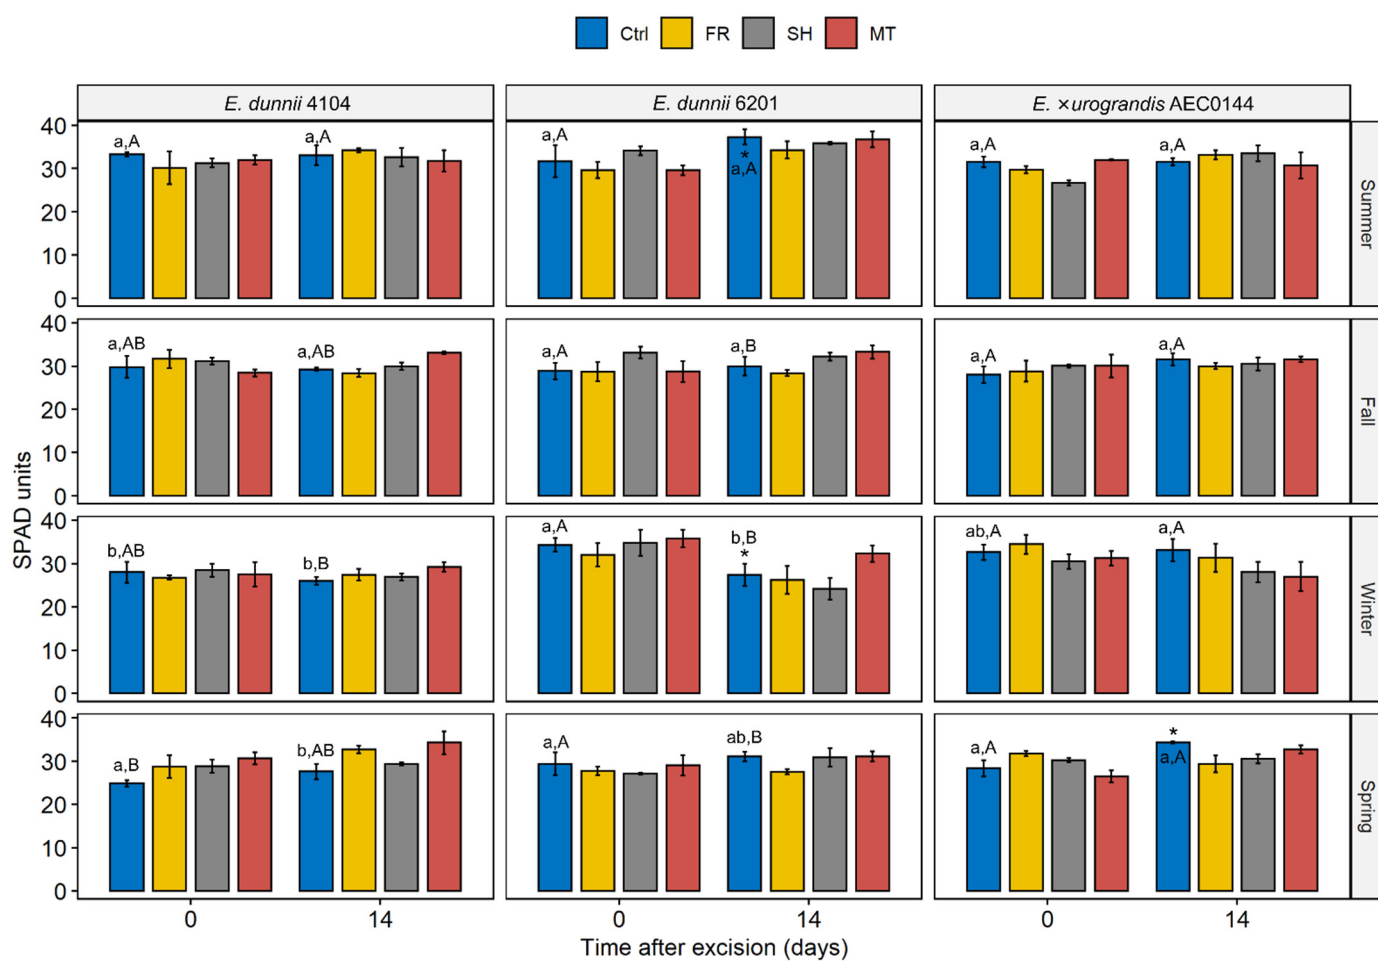

**Figure S1.** Chlorophyll content of *Eucalyptus dunnii* 6201, 4104 (hardR clones), and *E. ×urograndis* AEC0144 (easyR). Nondestructive chlorophyll measurements (SPAD units) of cuttings (n = 5) collected during summer, fall, winter, and spring under control (Ctrl), far-red enriched (FR), shade nets (SH), and mini-tunnel (MT) conditions. Bars represent mean ± SEM. Asterisks indicate significant difference between Ctrl cuttings at different timepoints ( $p \leq 0.05$ , Student's *t*-test). Different lowercase and uppercase letters indicate statistical significance when comparing Ctrl results across clones in the same season, and Ctrl results across seasons in the same clone, respectively, at the same timepoint (Factorial ANOVA, Estimated Marginal Means test,  $p \leq 0.05$ ).

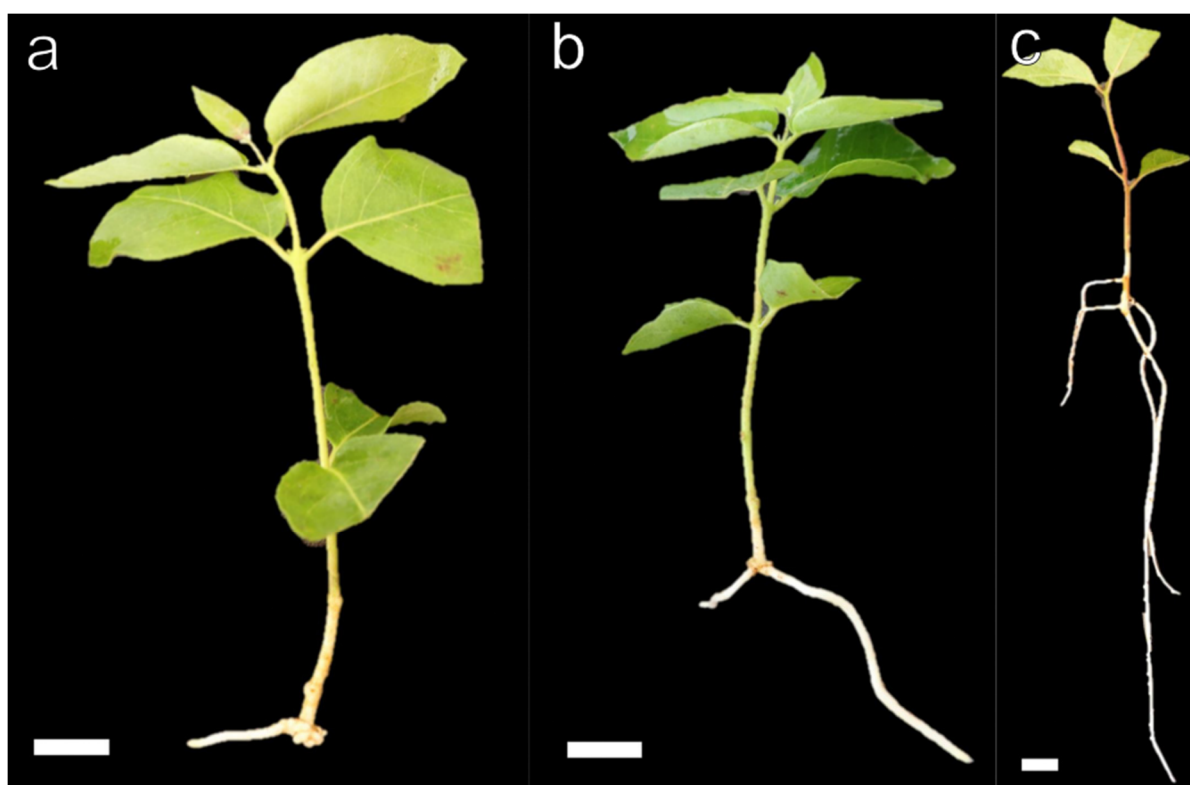

**Figure S2.** *Eucalyptus* spp. cutting morphology 21 days post excision. (a) *E. dunnii* 4104 and (b) *E. dunnii* 6201 (hardR) cuttings with callus-derived adventitious roots. (c) *E. xurograndis* AEC0144 (easyR) with more pronounced, directly formed adventitious roots. Scale bar = 1 cm.

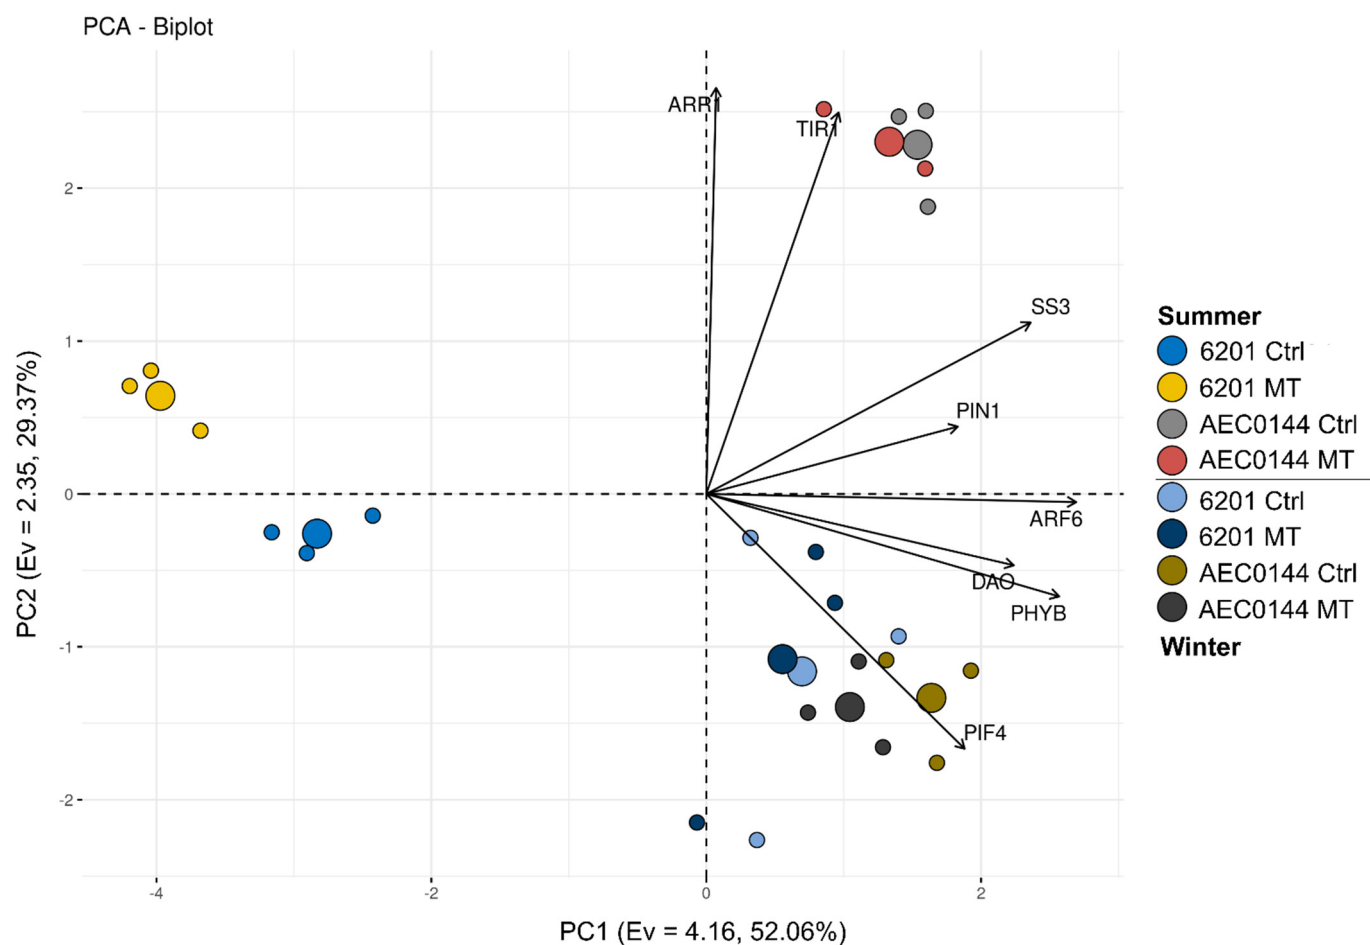

**Figure S3.** Principal Component Analysis of relative gene expression levels at 7 dpe. Axes represent principal components (PC) and corresponding eigenvalues (Ev) and percentage of variance explained. Regular circles represent biological replicates ( $n = 3$ ), while larger ones are the centroids for each group indicated in the legend. *Eucalyptus dunnii* 6201 (hardR); *E. ×urograndis* AEC0144 (easyR).

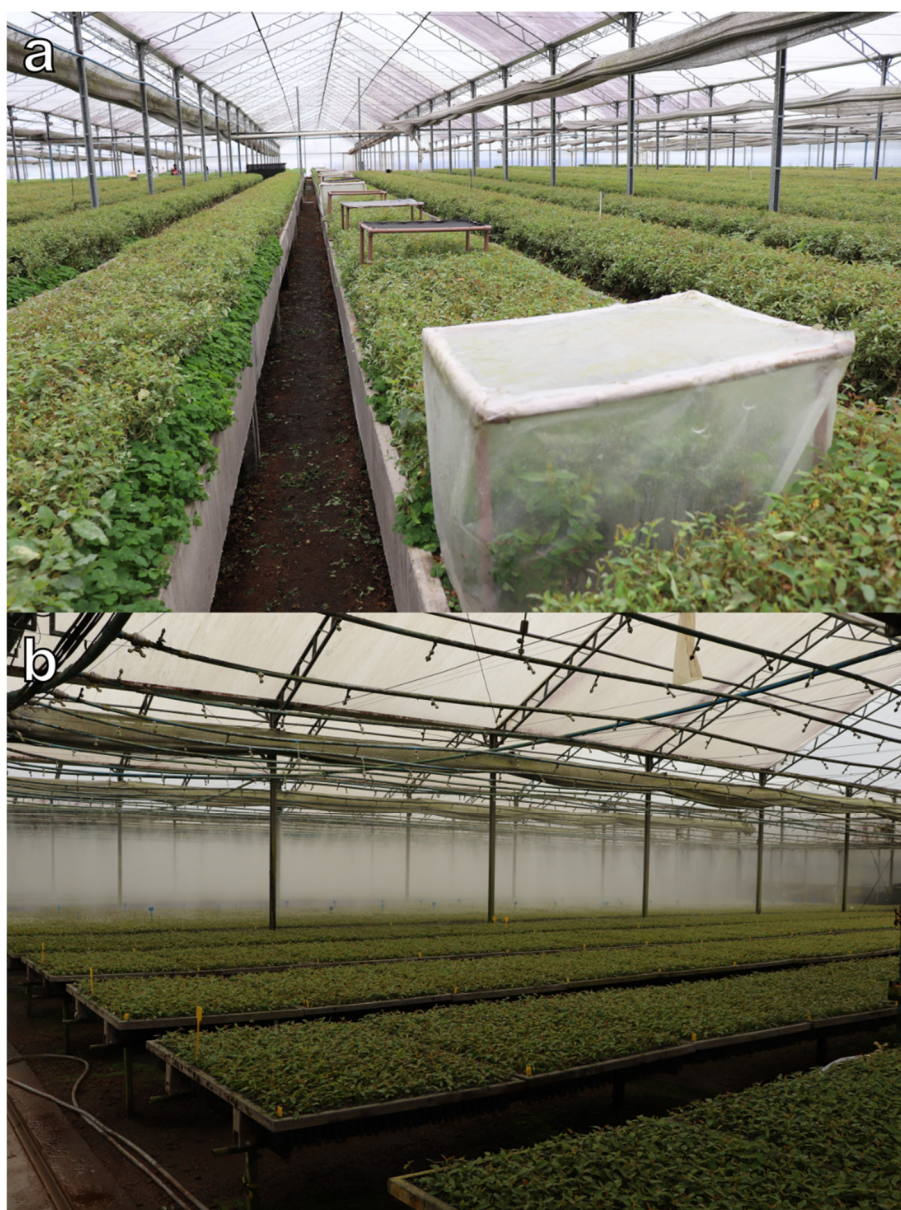

**Figure S4.** Growth environments used for *Eucalyptus* propagation. (a) Mini-stump growth facility (clonal garden). (b) Rooting greenhouse (fogging irrigation in the background).



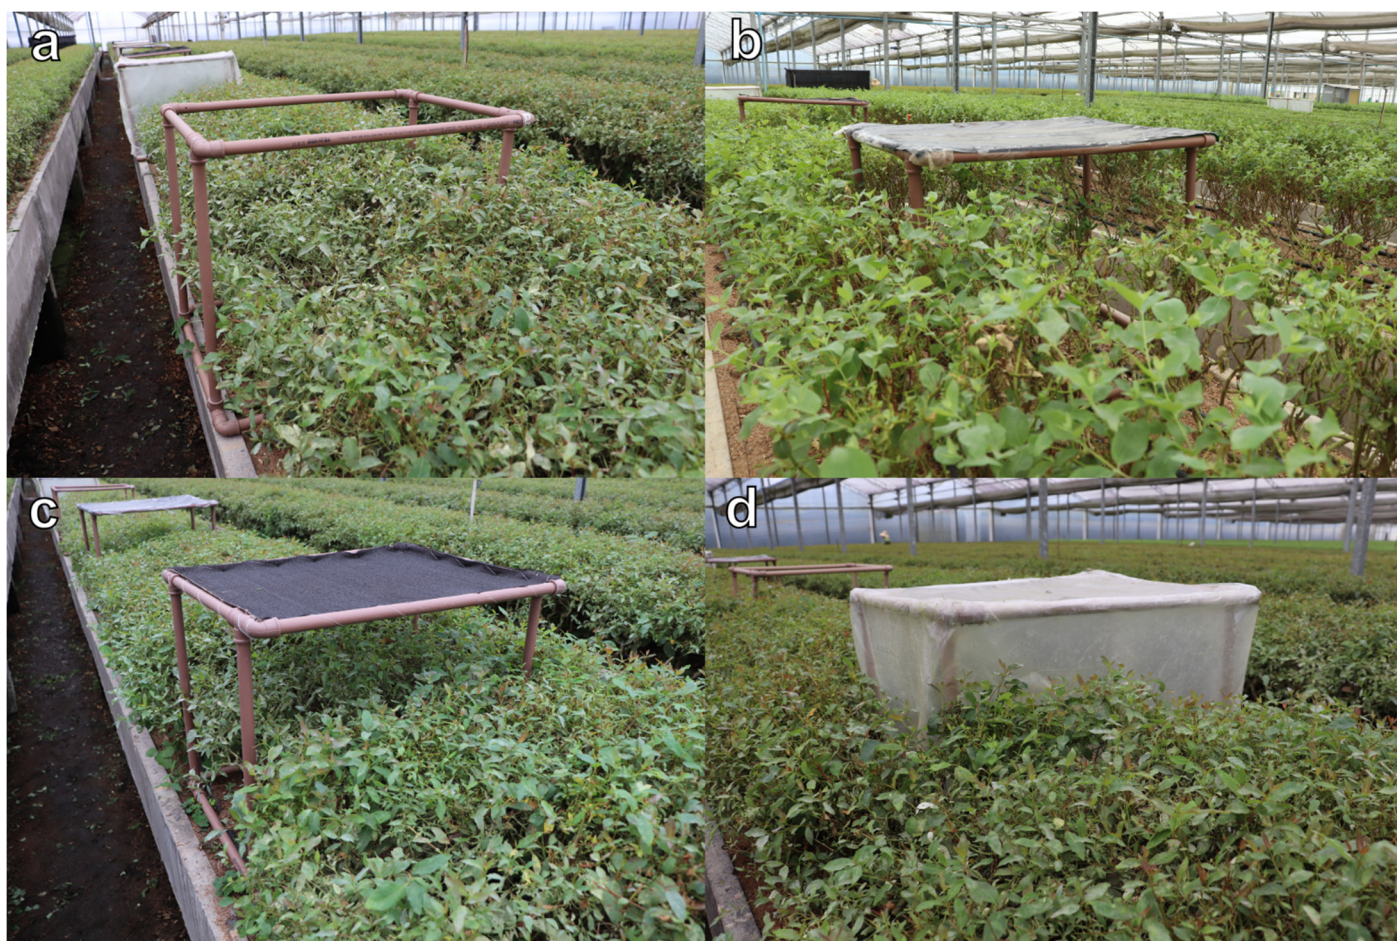

**Figure S5.** Mini-stump environmental modulation. (a) Control condition (Ctrl). (b) Far-red-enriched light treatment (FR). (c) Shade nets light treatment (SH). (d) Mini-tunnel treatment (MT).

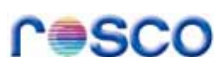

## COLOR FILTER TECHNICAL DATA SHEET

SWATCHBOOK: CINELUX  
 COLOR FILTER: #91 PRIMARY GREEN  
 DESCRIPTION: Color Effects Lighting Filter.  
 TRANSMISSION = 7% or -3.8 stop loss  
 MIREL SHIFT = Not Applicable.  
 CC EQUIVALENT = Not Applicable.

## COLORIMETRIC DATA

OBSERVER: CIE 1964 10° R: 0  
 SOURCE: \* 'A' (tungsten) G: 46  
 ° 'D65' (daylight) B: 35

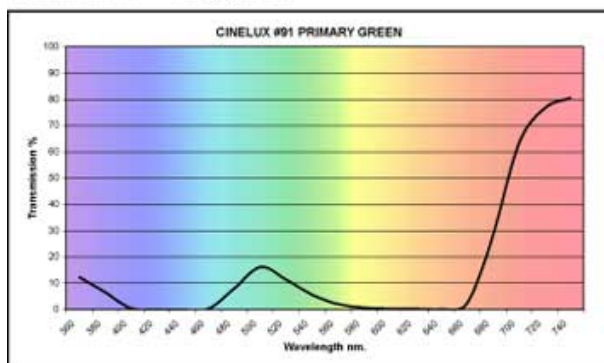

| HUNTER LAB |         |
|------------|---------|
| SOURCE A   |         |
| L*         | 22.888  |
| A*         | -38.718 |
| B*         | 4.872   |

| HUNTER LAB |         |
|------------|---------|
| SOURCE D65 |         |
| L*         | 26.773  |
| A*         | -56.764 |
| B*         | 19.1    |

| CIE 1964 |       |
|----------|-------|
| SOURCE A |       |
| Y        | 3.768 |
| (x)      | 0.293 |
| (y)      | 0.560 |

| CIE 1964   |       |
|------------|-------|
| SOURCE D65 |       |
| Y          | 5.013 |
| (x)        | 0.180 |
| (y)        | 0.571 |

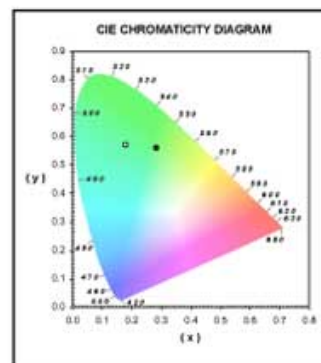

| nm.      | 360 | 380 | 400 | 420 | 440 | 460 | 480 | 500 | 520 | 540 | 560 | 580 | 600 | 620 | 640 | 660 | 680 | 700 | 720 | 740 |
|----------|-----|-----|-----|-----|-----|-----|-----|-----|-----|-----|-----|-----|-----|-----|-----|-----|-----|-----|-----|-----|
| Trans. % | 13  | 7   | 1   | 0   | 0   | 0   | 8   | 16  | 11  | 6   | 2   | 1   | 0   | 0   | 0   | 2   | 25  | 63  | 77  | 81  |

## MATERIAL SPECIFICATIONS:

General Description: Deep-Dyed Polyester Film  
 Substrate: PET (Polyethylene Terephthalate)  
 Thickness: 1.5 mil (.0015" or 38 micron)  
 Manufactured in: U.S.A.

## AVAILABLE SIZES:

- ✓ 20 in. x 24 in. sheets (50cm x 60cm)
- ✓ 21 in. x 24 in. sheets (53 x 60cm)
- ✓ 24 in. x 25 ft. rolls (60cm x 7.62m)
- ✓ 48 in. x 25 ft. rolls (121cm x 7.62m)
- 60 in. x 20 ft. rolls (152.4cm x 6.10m)
- 13.5 in. Diameter Glass (34.3cm) - Cut to order

Copyright 2001, Rosco Laboratories Inc.  
 All Rights Reserved.

**Figure S6.** Primary Green light filter technical data sheet. All rights reserved to Rosco Laboratories Inc.

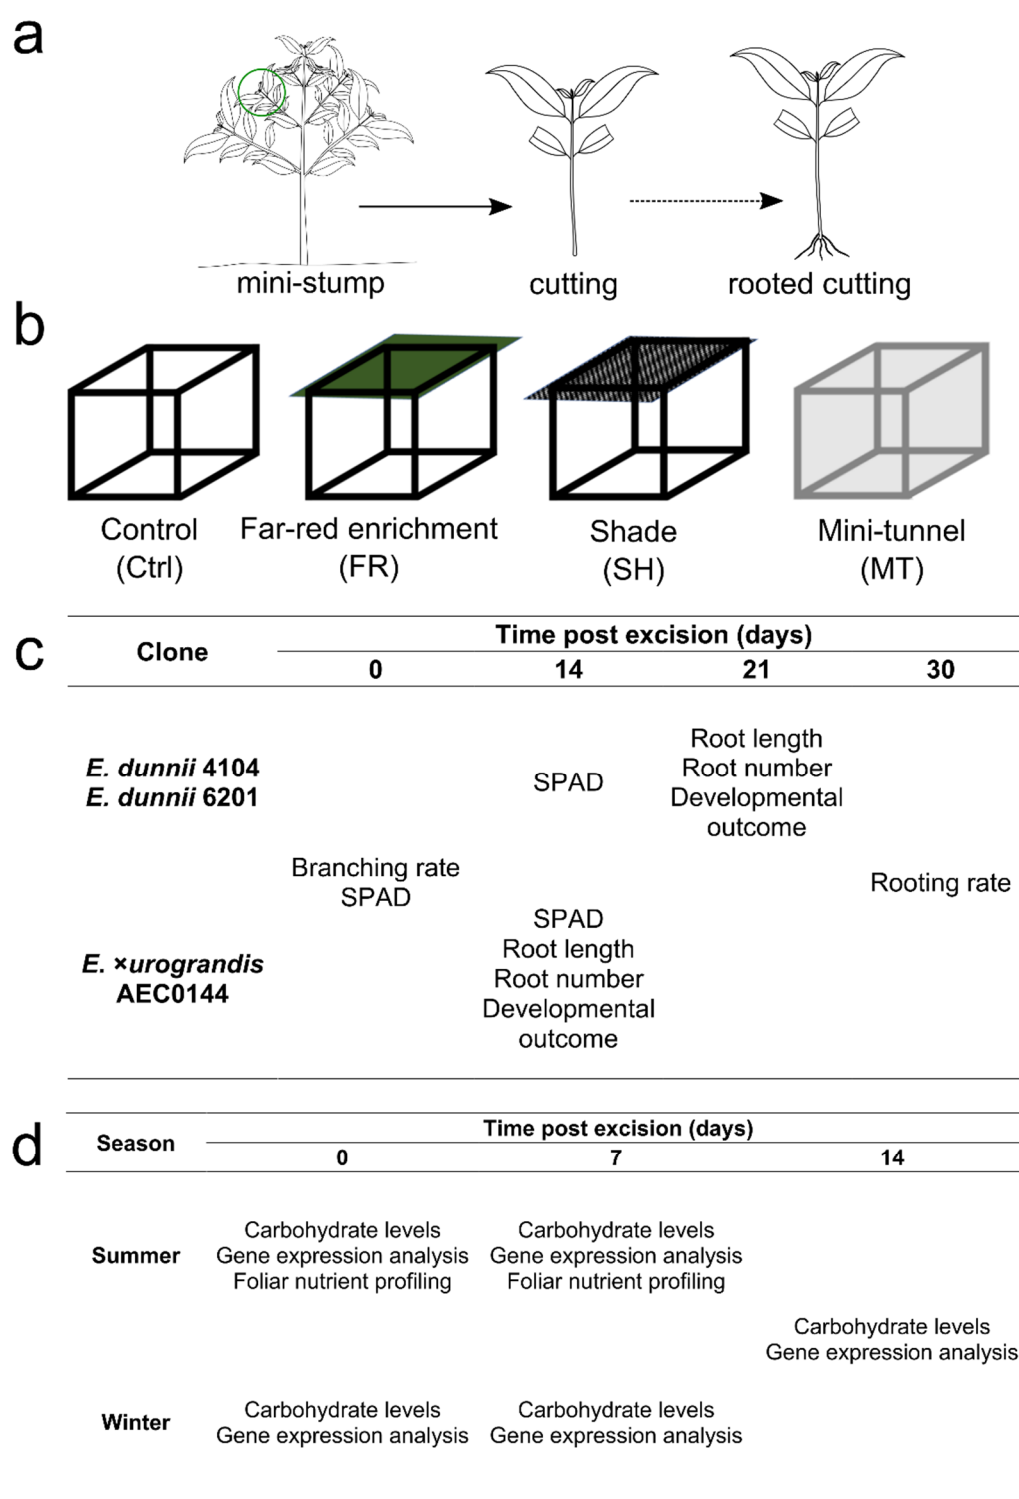

**Figure S7.** Overview of the propagation experimental design and analyses performed for whole-cutting samples. (a) *Eucalyptus dunnii* 4104 and 6201 (hardR clones) and *E. ×urograndis* AEC0144 (easyR) mini-stumps were cultivated in sand beds and weekly pruned to obtain cuttings, which were transferred to rooting substrate to form adventitious roots. (b) Mini-stumps were subjected to one of four conditions: control (Ctrl), far-red enrichment (FR), shade (SH), and mini-tunnel (MT). (c) For a year, branching and rooting rates were assessed, as well as chlorophyll levels (SPAD) and the developmental outcome of cuttings. Root growth measurements were made at different intervals for different species, due to their different growth rates. (d) *E. dunnii* 6201 and *E. ×urograndis* AEC0144 cuttings were monitored at 0-, 7-, and 14-days post excision, during summer



and winter, through carbohydrate quantification, gene expression analysis, and foliar nutrient profiling.

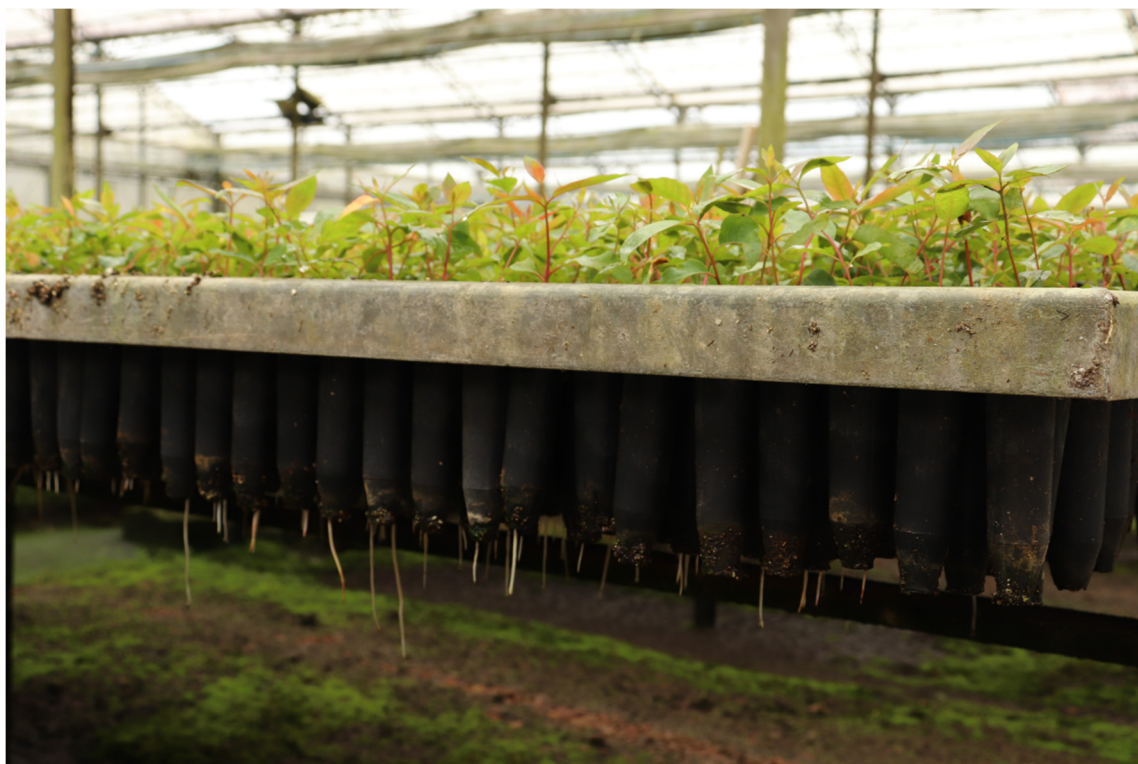

**Figure S8.** Rooted *Eucalyptus* cuttings on a rooting greenhouse table.

**Table S1.** Meteorological data for the study site. Values are shown as mean±sd.

| Season | Air temperature (°C)* | Relative humidity (%)* | Day length (h)** |
|--------|-----------------------|------------------------|------------------|
| Summer | 25.1±2.7              | 77.7±7.7               | 13.3±0.6         |
| Fall   | 20.1±2.6              | 85.1±8.0               | 10.9±0.6         |
| Winter | 15.4±4.1              | 77.6±8.7               | 10.9±0.6         |
| Spring | 22.2±3.5              | 71.1±11.5              | 13.3±0.6         |

\* Hourly measurements. \*\*Daily measurements.

**Table S2.** List of primers used for gene expression analysis. F = forward primer, R = reverse primer.

| Gene id.                                                    | Oligonucleotide sequence                              |
|-------------------------------------------------------------|-------------------------------------------------------|
| <i>ARF6</i><br><i>AUXIN RESPONSE FACTOR 6</i>               | F: AGTGAACCTCGCTCGCATGT<br>R: CGTCACCCAGGAGAAGGATA    |
| <i>ARR1</i><br><i>ARABIDOPSIS TYBE-B RESPONSE REGULATOR</i> | F: TTCCATGGTCAGCTGCAGTA<br>R: CCAGCACCACCACTTCAAAT    |
| <i>DAO</i><br><i>DIOXYGENASE FOR AUXIN OXIDATION</i>        | F: AGTGATGGACAAGTCGGGTT<br>R: GCTGCCTTCTTTGGACTCAAC   |
| <i>H2B</i><br><i>HISTONE 2B</i>                             | F: CGTCTCAGAAGGGACCAAGG<br>R: ACGGGTAACACACAACCTTCC   |
| <i>PHYB</i><br><i>PHYTOCHROME B</i>                         | F: TCGTCCAAGTCTGAAGCAA<br>R: TCACCAGGACACACGATCCTAA   |
| <i>PIF4</i><br><i>PHYTOCHROME INTERACTING FACTOR 4</i>      | F: CTCTGAAAGGAGGAGGAGGGAT<br>R: CCAGGAAACATCATCGGAGCC |
| <i>PIN1</i><br><i>PINFORMED 1</i>                           | F: TTTGCCCATAACGCTCGTCT<br>R: CACCATCCCACCATGTCCAA    |
| <i>SAND</i><br><i>SAND-DOMAIN PROTEIN</i>                   | F: CCATTCAACACTCTCCGACA<br>R: TGTGTGACCCAGCAGAGTAAT   |
| <i>SS3</i><br><i>STARCH SYNTHASE 3</i>                      | F: ATCGTGCTCGCCTTTGTTTG<br>R: CCAAATGAAATCCGCCCCG     |
| <i>TIR1</i><br><i>TRANSPORT INHIBITION RESPONSE 1</i>       | F: GTGGCACTATGGTGTGGTGA<br>R: AGCTCAGCCAAGTGCAAAT     |



**Table S3.** Pearson's correlation coefficient between gene expression levels at 0 dpe and principal components. Ev: eigenvalues, PC: principal component.

| PC (Ev, % variance explained) | <i>ARF6</i> | <i>ARR1</i> | <i>DAO</i> | <i>PHYB</i> | <i>PIF4</i> | <i>PIN1</i> | <i>SS3</i> | <i>TIR1</i> |
|-------------------------------|-------------|-------------|------------|-------------|-------------|-------------|------------|-------------|
| PC1 (3.76, 46.95%)            |             | 0.55        | 0.93       |             | 0.87        | 0.58        | 0.82       |             |
| PC2 (2.29, 27.85%)            | -0.65       | 0.71        |            | -0.57       |             |             |            | 0.86        |

**Table S4.** Pearson's correlation coefficient between gene expression levels at 7 dpe and principal components. Ev: eigenvalues, PC: principal component.

| PC (Ev, % variance explained) | <i>ARF6</i> | <i>ARR1</i> | <i>DAO</i> | <i>PHYB</i> | <i>PIF4</i> | <i>PIN1</i> | <i>SS3</i> | <i>TIR1</i> |
|-------------------------------|-------------|-------------|------------|-------------|-------------|-------------|------------|-------------|
| PC1 (4.16, 52.06%)            | 0.97        |             | 0.80       | 0.92        | 0.68        | 0.66        | 0.85       |             |
| PC2 (2.35, 29.37%)            |             | 0.95        |            |             | -0.60       |             |            | 0.90        |

**Table S5.** Pearson's correlation coefficient between gene expression levels at 14 dpe and principal components. Ev: eigenvalues, PC: principal component.

| PC (Ev, % variance explained) | <i>ARF6</i> | <i>ARR1</i> | <i>DAO</i> | <i>PHYB</i> | <i>PIF4</i> | <i>PIN1</i> | <i>SS3</i> | <i>TIR1</i> |
|-------------------------------|-------------|-------------|------------|-------------|-------------|-------------|------------|-------------|
| PC1 (3.36, 41.94%)            | 0.65        |             | 0.82       | 0.77        | 0.77        | 0.83        |            |             |
| PC2 (1.77, 22.11%)            |             | 0.72        |            |             |             |             | 0.76       | -0.66       |
| PC3 (1.03, 12.88%)            | -0.62       |             |            |             |             |             |            | 0.47        |

**Table S6.** Pearson's correlation coefficient between foliar nutrient levels and principal components. Ev: eigenvalues, PC: principal component.

| PC (Ev, % variance explained) | N    | P    | K    | Ca   | Mg   | S     | B    | Cu   | Fe    | Mn   | Zn   | Na   | Al    |
|-------------------------------|------|------|------|------|------|-------|------|------|-------|------|------|------|-------|
| PC1 (5.49, 42.23%)            | 0.90 | 0.92 | 0.76 | 0.84 | 0.77 | -0.55 |      |      | -0.61 | 0.66 |      |      | -0.67 |
| PC2 (2.93, 22.56%)            |      |      |      | 0.42 |      |       | 0.84 | 0.91 |       |      | 0.94 |      |       |
| PC3 (1.35, 10.41%)            |      |      |      |      |      | 0.60  |      |      |       |      |      | 0.80 |       |



**Table S7.** Productivity data ANOVA table. DFn: degrees of freedom in the numerator, DFd: degrees of freedom in the denominator, ges: generalized eta squared, sp: species, ttm: treatment.

| Branching rate       |     |      |          |           |       |       |
|----------------------|-----|------|----------|-----------|-------|-------|
| Effect               | DFn | DFd  | F        | p         | p<.05 | ges   |
| season               | 3   | 713  | 126.807  | 7.93e-66  | *     | 0.348 |
| sp                   | 2   | 713  | 25.237   | 2.57e-11  | *     | 0.066 |
| ttm                  | 3   | 713  | 24.342   | 5.27e-15  | *     | 0.093 |
| season:sp            | 6   | 713  | 7.379    | 1.13e-07  | *     | 0.058 |
| season:ttm           | 9   | 713  | 1.114    | 3.50e-01  |       | 0.014 |
| sp:ttm               | 6   | 713  | 3.385    | 3.00e-03  | *     | 0.028 |
| season:sp:ttm        | 18  | 713  | 1.129    | 3.18e-01  |       | 0.028 |
| Rooting rate         |     |      |          |           |       |       |
| Effect               | DFn | DFd  | F        | p         | p<.05 | ges   |
| season               | 3   | 2636 | 184.837  | 8.94e-109 | *     | 0.174 |
| sp                   | 2   | 2636 | 2255.684 | 0.00e+00  | *     | 0.631 |
| ttm                  | 3   | 2636 | 4.496    | 4.00e-03  | *     | 0.005 |
| season:sp            | 6   | 2636 | 53.474   | 1.86e-62  | *     | 0.109 |
| season:ttm           | 9   | 2636 | 8.638    | 7.22e-13  | *     | 0.029 |
| sp:ttm               | 6   | 2636 | 4.691    | 9.33e-05  | *     | 0.011 |
| season:sp:ttm        | 18  | 2636 | 17.528   | 8.13e-53  | *     | 0.107 |
| Overall productivity |     |      |          |           |       |       |
| Effect               | DFn | DFd  | F        | p         | p<.05 | ges   |
| season               | 3   | 705  | 297.049  | 1.27e-124 | *     | 0.558 |
| sp                   | 2   | 705  | 501.045  | 4.13e-136 | *     | 0.587 |
| ttm                  | 3   | 705  | 21.145   | 3.99e-13  | *     | 0.083 |
| season:sp            | 6   | 705  | 39.361   | 2.36e-41  | *     | 0.251 |
| season:ttm           | 9   | 705  | 4.636    | 5.58e-06  | *     | 0.056 |
| sp:ttm               | 6   | 705  | 4.703    | 1.05e-04  | *     | 0.038 |
| season:sp:ttm        | 18  | 705  | 1.463    | 9.60e-02  |       | 0.036 |

**Table S8.** Carbohydrate content ANOVA table. DFn: degrees of freedom in the numerator, DFd: degrees of freedom in the denominator, ges: generalized eta squared, sp: species, ttm: treatment, dpe: time post excision.

| Soluble sugar content |     |     |        |          |       |          |
|-----------------------|-----|-----|--------|----------|-------|----------|
| Effect                | DFn | DFd | F      | p        | p<.05 | ges      |
| season                | 1   | 48  | 3.112  | 8.40e-02 |       | 0.061000 |
| sp                    | 1   | 48  | 18.414 | 8.57e-02 | *     | 0.277000 |
| ttm                   | 1   | 48  | 3.208  | 8.00e-02 |       | 0.063000 |
| dpe                   | 2   | 48  | 11.487 | 8.38e-05 | *     | 0.324000 |
| season:sp             | 1   | 48  | 39.183 | 1.00e-07 | *     | 0.449000 |
| season:ttm            | 1   | 48  | 1.411  | 2.41e-01 |       | 0.029000 |
| sp:ttm                | 1   | 48  | 0.033  | 8.56e-01 |       | 0.000696 |
| season:dpe            | 2   | 48  | 2.458  | 9.60e-02 |       | 0.093000 |
| sp:dpe                | 2   | 48  | 1.804  | 1.76e-01 |       | 0.070000 |
| ttm:dpe               | 2   | 48  | 1.154  | 3.24e-01 |       | 0.046000 |
| season:sp:ttm         | 1   | 48  | 2.179  | 1.46e-01 |       | 0.043000 |
| season:sp:dpe         | 2   | 48  | 4.290  | 1.90e-02 | *     | 0.152000 |
| season:ttm:dpe        | 2   | 48  | 0.618  | 5.43e-01 |       | 0.025000 |
| sp:ttm:dpe            | 2   | 48  | 1.381  | 2.61e-01 |       | 0.054000 |
| season:sp:ttm:dpe     | 2   | 48  | 2.332  | 1.08e-01 |       | 0.089000 |
| Starch content        |     |     |        |          |       |          |
| Effect                | DFn | DFd | F      | p        | p<.05 | ges      |
| season                | 1   | 48  | 14.582 | 0.000385 | *     | 2.33e-01 |
| sp                    | 1   | 48  | 0.002  | 0.969000 |       | 3.23e-05 |
| ttm                   | 1   | 48  | 0.044  | 0.835000 |       | 9.14e-04 |
| dpe                   | 2   | 48  | 3.169  | 0.051000 |       | 1.17e-01 |
| season:sp             | 1   | 48  | 17.949 | 0.000102 | *     | 2.72e-01 |
| season:ttm            | 1   | 48  | 1.255  | 0.268000 |       | 2.50e-01 |
| sp:ttm                | 1   | 48  | 2.637  | 0.111000 |       | 5.20e-02 |
| season:dpe            | 2   | 48  | 3.155  | 0.052000 |       | 1.16e-01 |
| sp:dpe                | 2   | 48  | 4.832  | 0.012000 | *     | 1.68e-01 |
| ttm:dpe               | 2   | 48  | 0.708  | 0.498000 |       | 2.90e-02 |
| season:sp:ttm         | 1   | 48  | 2.583  | 0.115000 |       | 5.10e-02 |
| season:sp:dpe         | 2   | 48  | 1.752  | 0.184000 |       | 6.80e-02 |
| season:ttm:dpe        | 2   | 48  | 0.247  | 0.782000 |       | 1.00e-02 |
| sp:ttm:dpe            | 2   | 48  | 0.714  | 0.495000 |       | 2.90e-02 |
| season:sp:ttm:dpe     | 2   | 48  | 0.750  | 0.478000 |       | 3.00e-02 |

**Table S9.** RT-qPCR data ANOVA table. DFn: degrees of freedom in the numerator, DFd: degrees of freedom in the denominator, ges: generalized eta squared, sp: species, ttm: treatment, dpe: time post excision.

| <i>ARR1</i> expression levels |     |     |        |          |       |          |
|-------------------------------|-----|-----|--------|----------|-------|----------|
| Effect                        | DFn | DFd | F      | p        | p<.05 | ges      |
| season                        | 1   | 48  | 31.478 | 9.81e-07 | *     | 3.96e-01 |
| sp                            | 1   | 48  | 7.687  | 8.00e-03 | *     | 1.38e-01 |
| ttm                           | 1   | 48  | 4.614  | 3.70e-02 | *     | 8.80e-02 |
| dpe                           | 2   | 48  | 0.711  | 4.96e-01 |       | 2.90e-02 |
| season:sp                     | 1   | 48  | 56.881 | 1.09e-09 | *     | 5.42e-01 |
| season:ttm                    | 1   | 48  | 0.010  | 9.20e-01 |       | 2.12e-04 |
| sp:ttm                        | 1   | 48  | 0.149  | 7.02e-01 |       | 3.00e-03 |
| season:dpe                    | 2   | 48  | 8.341  | 7.78e-04 | *     | 2.58e-01 |
| sp:dpe                        | 2   | 48  | 4.111  | 2.20e-02 | *     | 1.46e-01 |
| ttm:dpe                       | 2   | 48  | 1.475  | 2.39e-01 |       | 5.80e-02 |
| season:sp:ttm                 | 1   | 48  | 0.003  | 9.60e-01 |       | 5.35e-05 |
| season:sp:dpe                 | 2   | 48  | 2.512  | 9.20e-02 |       | 9.50e-02 |
| season:ttm:dpe                | 2   | 48  | 1.462  | 2.42e-01 |       | 5.70e-02 |
| sp:ttm:dpe                    | 2   | 48  | 0.185  | 8.32e-01 |       | 8.00e-03 |
| season:sp:ttm:dpe             | 2   | 48  | 0.717  | 4.93e-01 |       | 2.90e-02 |
| <i>DAO</i> expression levels  |     |     |        |          |       |          |
| Effect                        | DFn | DFd | F      | p        | p<.05 | ges      |
| season                        | 1   | 48  | 45.983 | 1.59e-08 | *     | 4.89e-01 |
| sp                            | 1   | 48  | 15.161 | 3.05e-04 | *     | 2.40e-01 |
| ttm                           | 1   | 48  | 2.625  | 1.12e-01 |       | 5.20e-02 |
| dpe                           | 2   | 48  | 11.571 | 7.92e-05 | *     | 3.25e-01 |
| season:sp                     | 1   | 48  | 17.033 | 1.45e-04 | *     | 2.62e-01 |
| season:ttm                    | 1   | 48  | 0.104  | 7.49e-01 |       | 2.00e-03 |
| sp:ttm                        | 1   | 48  | 0.004  | 9.50e-01 |       | 8.25e-05 |
| season:dpe                    | 2   | 48  | 9.559  | 3.20e-04 | *     | 2.85e-01 |
| sp:dpe                        | 2   | 48  | 1.330  | 2.74e-01 |       | 5.30e-02 |
| ttm:dpe                       | 2   | 48  | 0.926  | 4.03e-01 |       | 3.70e-02 |
| season:sp:ttm                 | 1   | 48  | 0.002  | 9.63e-01 |       | 4.56e-05 |
| season:sp:dpe                 | 2   | 48  | 8.486  | 6.99e-04 | *     | 2.61e-01 |
| season:ttm:dpe                | 2   | 48  | 5.043  | 1.00e-02 | *     | 1.74e-01 |
| sp:ttm:dpe                    | 2   | 48  | 4.502  | 1.60e-02 | *     | 1.58e-01 |
| season:sp:ttm:dpe             | 2   | 48  | 0.027  | 9.73e-01 |       | 1.00e-03 |
| <i>PHYB</i> expression levels |     |     |        |          |       |          |
| Effect                        | DFn | DFd | F      | p        | p<.05 | ges      |
| season                        | 1   | 48  | 99.392 | 2.80e-13 | *     | 0.674000 |
| sp                            | 1   | 48  | 27.384 | 3.63e-06 | *     | 0.363000 |
| ttm                           | 1   | 48  | 0.033  | 8.56e-01 |       | 0.000695 |
| dpe                           | 2   | 48  | 6.257  | 4.00e-03 | *     | 0.207000 |
| season:sp                     | 1   | 48  | 5.260  | 2.60e-02 | *     | 0.099000 |
| season:ttm                    | 1   | 48  | 0.302  | 5.85e-01 |       | 0.006000 |
| sp:ttm                        | 1   | 48  | 0.021  | 8.85e-01 |       | 0.000439 |
| season:dpe                    | 2   | 48  | 1.330  | 2.74e-01 |       | 0.053000 |
| sp:dpe                        | 2   | 48  | 3.445  | 4.00e-02 | *     | 0.126000 |
| ttm:dpe                       | 2   | 48  | 1.333  | 2.73e-01 |       | 0.053000 |

|                   |   |    |        |          |   |          |
|-------------------|---|----|--------|----------|---|----------|
| season:sp:ttm     | 1 | 48 | 0.015  | 9.04e-01 |   | 0.000307 |
| season:sp:dpe     | 2 | 48 | 13.436 | 2.32e-05 | * | 0.359000 |
| season:ttm:dpe    | 2 | 48 | 2.630  | 8.20e-02 |   | 0.099000 |
| sp:ttm:dpe        | 2 | 48 | 0.540  | 5.68e-01 |   | 0.022000 |
| season:sp:ttm:dpe | 2 | 48 | 0.467  | 6.30e-01 |   | 0.019000 |

**PIF4 expression levels**

| Effect            | DFn | DFd | F       | p        | p<.05 | ges     |
|-------------------|-----|-----|---------|----------|-------|---------|
| season            | 1   | 48  | 129.082 | 3.30e-15 | *     | 0.72900 |
| sp                | 1   | 48  | 41.486  | 5.30e-08 | *     | 0.46400 |
| ttm               | 1   | 48  | 0.629   | 4.32e-01 |       | 0.01300 |
| dpe               | 2   | 48  | 2.071   | 1.37e-01 |       | 0.07900 |
| season:sp         | 1   | 48  | 7.914   | 7.00e-03 | *     | 0.14200 |
| season:ttm        | 1   | 48  | 0.491   | 4.87e-01 |       | 0.01000 |
| sp:ttm            | 1   | 48  | 0.475   | 4.94e-01 |       | 0.01000 |
| season:dpe        | 2   | 48  | 0.109   | 8.97e-01 |       | 0.00500 |
| sp:dpe            | 2   | 48  | 4.247   | 2.00e-02 | *     | 0.15000 |
| ttm:dpe           | 2   | 48  | 4.061   | 2.30e-02 | *     | 0.14500 |
| season:sp:ttm     | 1   | 48  | 0.030   | 8.63e-01 |       | 0.00063 |
| season:sp:dpe     | 2   | 48  | 34.709  | 4.74e-10 | *     | 0.59100 |
| season:ttm:dpe    | 2   | 48  | 0.247   | 7.82e-01 |       | 0.01000 |
| sp:ttm:dpe        | 2   | 48  | 0.906   | 4.11e-01 |       | 0.03600 |
| season:sp:ttm:dpe | 2   | 48  | 4.458   | 1.70e-02 | *     | 0.15700 |

**PIN1 expression levels**

| Effect            | DFn | DFd | F         | p        | p<.05 | ges      |
|-------------------|-----|-----|-----------|----------|-------|----------|
| season            | 1   | 48  | 34.322000 | 4.12e-07 | *     | 4.17e-01 |
| sp                | 1   | 48  | 6.712000  | 1.30e-02 | *     | 1.23e-01 |
| ttm               | 1   | 48  | 4.740000  | 3.40e-02 | *     | 9.00e-02 |
| dpe               | 2   | 48  | 0.726000  | 4.89e-01 |       | 2.90e-02 |
| season:sp         | 1   | 48  | 59.220000 | 6.37e-10 | *     | 5.52e-01 |
| season:ttm        | 1   | 48  | 0.024000  | 8.76e-01 |       | 5.10e-04 |
| sp:ttm            | 1   | 48  | 0.223000  | 6.39e-01 |       | 5.00e-03 |
| season:dpe        | 2   | 48  | 9.630000  | 3.04e-04 | *     | 2.86e-01 |
| sp:dpe            | 2   | 48  | 4.173000  | 2.10e-02 | *     | 1.48e-01 |
| ttm:dpe           | 2   | 48  | 1.801000  | 1.76e-01 |       | 7.00e-02 |
| season:sp:ttm     | 1   | 48  | 0.000316  | 9.86e-01 |       | 6.59e-06 |
| season:sp:dpe     | 2   | 48  | 3.239000  | 4.80e-02 | *     | 1.19e-01 |
| season:ttm:dpe    | 2   | 48  | 1.731000  | 1.88e-01 |       | 6.70e-02 |
| sp:ttm:dpe        | 2   | 48  | 0.177000  | 8.38e-01 |       | 7.00e-03 |
| season:sp:ttm:dpe | 2   | 48  | 0.677000  | 5.13e-01 |       | 2.70e-02 |

**SS3 expression levels**

| Effect     | DFn | DFd | F      | p        | p<.05 | ges   |
|------------|-----|-----|--------|----------|-------|-------|
| season     | 1   | 48  | 0.120  | 7.31e-01 |       | 0.002 |
| sp         | 1   | 48  | 93.168 | 7.96e-13 | *     | 0.660 |
| ttm        | 1   | 48  | 0.099  | 7.55e-01 |       | 0.002 |
| dpe        | 2   | 48  | 5.167  | 9.00e-03 | *     | 0.177 |
| season:sp  | 1   | 48  | 8.191  | 6.00e-03 | *     | 0.146 |
| season:ttm | 1   | 48  | 1.158  | 2.87e-01 |       | 0.024 |
| sp:ttm     | 1   | 48  | 0.125  | 7.25e-01 |       | 0.003 |
| season:dpe | 2   | 48  | 1.489  | 2.36e-01 |       | 0.058 |



|                   |   |    |        |          |   |       |
|-------------------|---|----|--------|----------|---|-------|
| sp:dpe            | 2 | 48 | 3.834  | 2.90e-02 | * | 0.138 |
| ttm:dpe           | 2 | 48 | 0.541  | 5.86e-01 |   | 0.022 |
| season:sp:ttm     | 1 | 48 | 0.506  | 4.80e-01 |   | 0.010 |
| season:sp:dpe     | 2 | 48 | 18.183 | 1.32e-06 | * | 0.431 |
| season:ttm:dpe    | 2 | 48 | 0.855  | 4.31e-01 |   | 0.034 |
| sp:ttm:dpe        | 2 | 48 | 1.070  | 3.51e-01 |   | 0.043 |
| season:sp:ttm:dpe | 2 | 48 | 2.110  | 1.32e-01 |   | 0.081 |

***TIR1* expression levels**

| Effect            | DFn | DFd | F       | p        | p<.05 | ges   |
|-------------------|-----|-----|---------|----------|-------|-------|
| season            | 1   | 48  | 551.135 | 5.38e-28 | *     | 0.920 |
| sp                | 1   | 48  | 17.680  | 1.13e-04 | *     | 0.269 |
| ttm               | 1   | 48  | 1.376   | 2.47e-01 |       | 0.028 |
| dpe               | 2   | 48  | 4.982   | 1.10e-02 | *     | 0.172 |
| season:sp         | 1   | 48  | 3.324   | 7.50e-02 |       | 0.065 |
| season:ttm        | 1   | 48  | 0.380   | 5.40e-01 |       | 0.008 |
| sp:ttm            | 1   | 48  | 0.393   | 5.34e-01 |       | 0.008 |
| season:dpe        | 2   | 48  | 1.573   | 2.18e-01 |       | 0.062 |
| sp:dpe            | 2   | 48  | 9.363   | 3.69e-04 | *     | 0.281 |
| ttm:dpe           | 2   | 48  | 1.116   | 3.36e-01 |       | 0.044 |
| season:sp:ttm     | 1   | 48  | 0.275   | 6.02e-01 |       | 0.006 |
| season:sp:dpe     | 2   | 48  | 6.825   | 2.00e-03 | *     | 0.221 |
| season:ttm:dpe    | 2   | 48  | 1.100   | 3.41e-01 |       | 0.044 |
| sp:ttm:dpe        | 2   | 48  | 1.572   | 2.18e-01 |       | 0.061 |
| season:sp:ttm:dpe | 2   | 48  | 1.701   | 1.93e-01 |       | 0.066 |

**Table S10.** Nutrient profile ANOVA table. DFn: degrees of freedom in the numerator, DFd: degrees of freedom in the denominator, ges: generalized eta squared, sp: species, ttm: treatment, dpe: time post excision.

| N content  |     |     |        |          |       |          |
|------------|-----|-----|--------|----------|-------|----------|
| Effect     | DFn | DFd | F      | p        | p<.05 | ges      |
| sp         | 1   | 16  | 1.996  | 1.77e-01 |       | 0.111    |
| ttm        | 1   | 16  | 0.426  | 5.23e-01 |       | 0.026    |
| dpe        | 1   | 16  | 77.713 | 1.54e-07 | *     | 0.829    |
| sp:ttm     | 1   | 16  | 0.975  | 3.38e-01 |       | 0.057    |
| sp:dpe     | 1   | 16  | 9.229  | 8.00e-03 | *     | 0.366    |
| ttm:dpe    | 1   | 16  | 0.165  | 6.90e-01 |       | 0.010    |
| sp:ttm:dpe | 1   | 16  | 0.032  | 8.61e-01 |       | 0.002    |
| P content  |     |     |        |          |       |          |
| Effect     | DFn | DFd | F      | p        | p<.05 | ges      |
| sp         | 1   | 19  | 0.835  | 3.72e-01 |       | 0.042000 |
| ttm        | 1   | 19  | 0.009  | 9.24e-01 |       | 0.000489 |
| dpe        | 1   | 19  | 55.255 | 4.90e-07 | *     | 0.744000 |
| sp:ttm     | 1   | 19  | 0.131  | 7.21e-01 |       | 0.007000 |
| sp:dpe     | 1   | 19  | 4.077  | 5.80e-02 |       | 0.177000 |
| ttm:dpe    | 1   | 19  | 0.899  | 3.55e-01 |       | 0.045000 |
| sp:ttm:dpe | 1   | 19  | 0.562  | 4.62e-01 |       | 0.029000 |
| K content  |     |     |        |          |       |          |
| Effect     | DFn | DFd | F      | p        | p<.05 | ges      |
| sp         | 1   | 17  | 1.184  | 0.292000 |       | 0.065    |
| ttm        | 1   | 17  | 1.012  | 0.329000 |       | 0.056    |
| dpe        | 1   | 17  | 23.195 | 0.000161 | *     | 0.577    |
| sp:ttm     | 1   | 17  | 3.127  | 0.095000 |       | 0.155    |
| sp:dpe     | 1   | 17  | 0.310  | 0.585000 |       | 0.018    |
| ttm:dpe    | 1   | 17  | 2.059  | 0.169000 |       | 0.108    |
| sp:ttm:dpe | 1   | 17  | 12.697 | 0.002000 | *     | 0.428    |
| Ca content |     |     |        |          |       |          |
| Effect     | DFn | DFd | F      | p        | p<.05 | ges      |
| sp         | 1   | 17  | 1.890  | 1.87e-01 |       | 0.100    |
| ttm        | 1   | 17  | 1.380  | 2.56e-01 |       | 0.075    |
| dpe        | 1   | 17  | 67.611 | 2.51e-07 | *     | 0.799    |
| sp:ttm     | 1   | 17  | 5.916  | 2.60e-02 | *     | 0.258    |
| sp:dpe     | 1   | 17  | 0.437  | 5.17e-01 |       | 0.025    |
| ttm:dpe    | 1   | 17  | 28.100 | 5.87e-05 | *     | 0.623    |
| sp:ttm:dpe | 1   | 17  | 1.029  | 3.25e-01 |       | 0.057    |
| Mg content |     |     |        |          |       |          |
| Effect     | DFn | DFd | F      | p        | p<.05 | ges      |
| sp         | 1   | 17  | 0.085  | 7.74e-01 |       | 0.005000 |
| ttm        | 1   | 17  | 0.015  | 9.03e-01 |       | 0.000908 |
| dpe        | 1   | 17  | 18.059 | 5.41e-04 | *     | 0.515000 |
| sp:ttm     | 1   | 17  | 0.181  | 6.76e-01 |       | 0.011000 |
| sp:dpe     | 1   | 17  | 0.011  | 9.17e-01 |       | 0.000651 |
| ttm:dpe    | 1   | 17  | 25.862 | 9.17e-05 | *     | 0.603000 |
| sp:ttm:dpe | 1   | 17  | 0.158  | 6.96e-01 |       | 0.009000 |

| S content  |     |     |        |          |       |       |
|------------|-----|-----|--------|----------|-------|-------|
| Effect     | DFn | DFd | F      | p        | p<.05 | ges   |
| sp         | 1   | 16  | 0.965  | 0.341    |       | 0.057 |
| ttm        | 1   | 16  | 2.018  | 0.175    |       | 0.112 |
| dpe        | 1   | 16  | 8.955  | 0.009    | *     | 0.359 |
| sp:ttm     | 1   | 16  | 7.401  | 0.015    | *     | 0.316 |
| sp:dpe     | 1   | 16  | 0.716  | 0.410    |       | 0.043 |
| ttm:dpe    | 1   | 16  | 0.167  | 0.689    |       | 0.010 |
| sp:ttm:dpe | 1   | 16  | 1.285  | 0.274    |       | 0.074 |
| B content  |     |     |        |          |       |       |
| Effect     | DFn | DFd | F      | p        | p<.05 | ges   |
| sp         | 1   | 16  | 8.588  | 0.010    | *     | 0.349 |
| ttm        | 1   | 16  | 6.705  | 0.020    | *     | 0.295 |
| dpe        | 1   | 16  | 8.632  | 0.010    | *     | 0.350 |
| sp:ttm     | 1   | 16  | 8.451  | 0.010    | *     | 0.346 |
| sp:dpe     | 1   | 16  | 9.711  | 0.007    | *     | 0.379 |
| ttm:dpe    | 1   | 16  | 10.341 | 0.005    | *     | 0.393 |
| sp:ttm:dpe | 1   | 16  | 14.386 | 0.002    | *     | 0.473 |
| Cu content |     |     |        |          |       |       |
| Effect     | DFn | DFd | F      | p        | p<.05 | ges   |
| sp         | 1   | 16  | 0.979  | 0.337    |       | 0.058 |
| ttm        | 1   | 16  | 1.327  | 0.266    |       | 0.077 |
| dpe        | 1   | 16  | 8.160  | 0.011    | *     | 0.338 |
| sp:ttm     | 1   | 16  | 6.868  | 0.019    | *     | 0.300 |
| sp:dpe     | 1   | 16  | 1.072  | 0.316    |       | 0.063 |
| ttm:dpe    | 1   | 16  | 1.691  | 0.212    |       | 0.096 |
| sp:ttm:dpe | 1   | 16  | 6.482  | 0.022    | *     | 0.288 |
| Fe content |     |     |        |          |       |       |
| Effect     | DFn | DFd | F      | p        | p<.05 | ges   |
| sp         | 1   | 17  | 0.037  | 0.850    |       | 0.002 |
| ttm        | 1   | 17  | 0.523  | 0.479    |       | 0.030 |
| dpe        | 1   | 17  | 6.103  | 0.024    | *     | 0.264 |
| sp:ttm     | 1   | 17  | 1.625  | 0.220    |       | 0.087 |
| sp:dpe     | 1   | 17  | 6.054  | 0.025    | *     | 0.263 |
| ttm:dpe    | 1   | 17  | 0.436  | 0.518    |       | 0.025 |
| sp:ttm:dpe | 1   | 17  | 4.539  | 0.048    | *     | 0.211 |
| Mn content |     |     |        |          |       |       |
| Effect     | DFn | DFd | F      | p        | p<.05 | ges   |
| sp         | 1   | 16  | 20.449 | 3.47e-04 | *     | 0.561 |
| ttm        | 1   | 16  | 19.502 | 4.33e-04 | *     | 0.549 |
| dpe        | 1   | 16  | 38.455 | 1.27e-05 | *     | 0.706 |
| sp:ttm     | 1   | 16  | 0.904  | 3.56e-01 |       | 0.053 |
| sp:dpe     | 1   | 16  | 0.046  | 8.33e-01 |       | 0.003 |
| ttm:dpe    | 1   | 16  | 0.850  | 3.70e-01 |       | 0.050 |
| sp:ttm:dpe | 1   | 16  | 1.702  | 2.10e-01 |       | 0.096 |
| Zn content |     |     |        |          |       |       |
| Effect     | DFn | DFd | F      | p        | p<.05 | ges   |
| sp         | 1   | 18  | 0.627  | 0.439    |       | 0.034 |
| ttm        | 1   | 18  | 0.961  | 0.340    |       | 0.051 |

|            |   |    |       |       |   |       |
|------------|---|----|-------|-------|---|-------|
| dpe        | 1 | 18 | 7.811 | 0.012 | * | 0.303 |
| sp:ttm     | 1 | 18 | 5.794 | 0.027 | * | 0.243 |
| sp:dpe     | 1 | 18 | 1.188 | 0.290 |   | 0.062 |
| ttm:dpe    | 1 | 18 | 1.375 | 0.256 |   | 0.071 |
| sp:ttm:dpe | 1 | 18 | 5.926 | 0.026 | * | 0.248 |

#### Na content

| Effect     | DFn | DFd | F     | p     | p<.05 | ges   |
|------------|-----|-----|-------|-------|-------|-------|
| sp         | 1   | 17  | 5.012 | 0.039 | *     | 0.228 |
| ttm        | 1   | 17  | 0.852 | 0.369 |       | 0.048 |
| dpe        | 1   | 17  | 0.421 | 0.525 |       | 0.024 |
| sp:ttm     | 1   | 17  | 1.928 | 0.183 |       | 0.102 |
| sp:dpe     | 1   | 17  | 0.133 | 0.720 |       | 0.008 |
| ttm:dpe    | 1   | 17  | 0.242 | 0.629 |       | 0.014 |
| sp:ttm:dpe | 1   | 17  | 3.278 | 0.088 |       | 0.162 |

#### Al content

| Effect     | DFn | DFd | F         | p        | p<.05 | ges      |
|------------|-----|-----|-----------|----------|-------|----------|
| sp         | 1   | 16  | 0.071000  | 0.793000 |       | 4.00e-03 |
| ttm        | 1   | 16  | 3.134000  | 0.096000 |       | 1.64e-01 |
| dpe        | 1   | 16  | 17.535000 | 0.000696 | *     | 5.23e-01 |
| sp:ttm     | 1   | 16  | 0.084000  | 0.775000 |       | 5.00e-03 |
| sp:dpe     | 1   | 16  | 0.525000  | 0.479000 |       | 3.20e-02 |
| ttm:dpe    | 1   | 16  | 1.050000  | 0.321000 |       | 6.20e-02 |
| sp:ttm:dpe | 1   | 16  | 0.000503  | 0.982000 |       | 3.15e-05 |
